# Supplementary material for: SIPA1 Regulates LINC01615 to Promote Metastasis in Triple-Negative Breast Cancer
Source: MDPI journal article supplement (doi:10.3390/cancers14194815), 2022-10-01
Supplement: s1 [file s1]

# SIPA1 Regulates LINC01615 to Promote Metastasis in Triple-Negative Breast Cancer

Yuan Xiang, Lingyun Feng, Hui Liu, Yuhuan Liu, Jiapeng Li, Li Su and Xinghua Liao

| Sample                | Total<br>Raw<br>Reads<br>(M) | Total<br>Clean<br>Reads (M) | Total<br>Clean<br>Bases<br>(Gb) | Clean<br>Reads<br>Q30 (%) | Clean<br>Reads<br>Ratio<br>(%) |
|-----------------------|------------------------------|-----------------------------|---------------------------------|---------------------------|--------------------------------|
| MDA-MB-231_1          | 119.94                       | 113.48                      | 11.35                           | 92.83                     | 94.62                          |
| MDA-MB-231_2          | 119.94                       | 113.12                      | 11.31                           | 93.28                     | 94.32                          |
| MDA-MB-231/sh-SIPA1_1 | 119.94                       | 113.71                      | 11.37                           | 93.36                     | 94.81                          |
| MDA-MB-231/sh-SIPA1_2 | 119.94                       | 114.03                      | 11.4                            | 93.77                     | 95.08                          |

**Figure S1.** High-throughput sequencing data output and post-QC results.

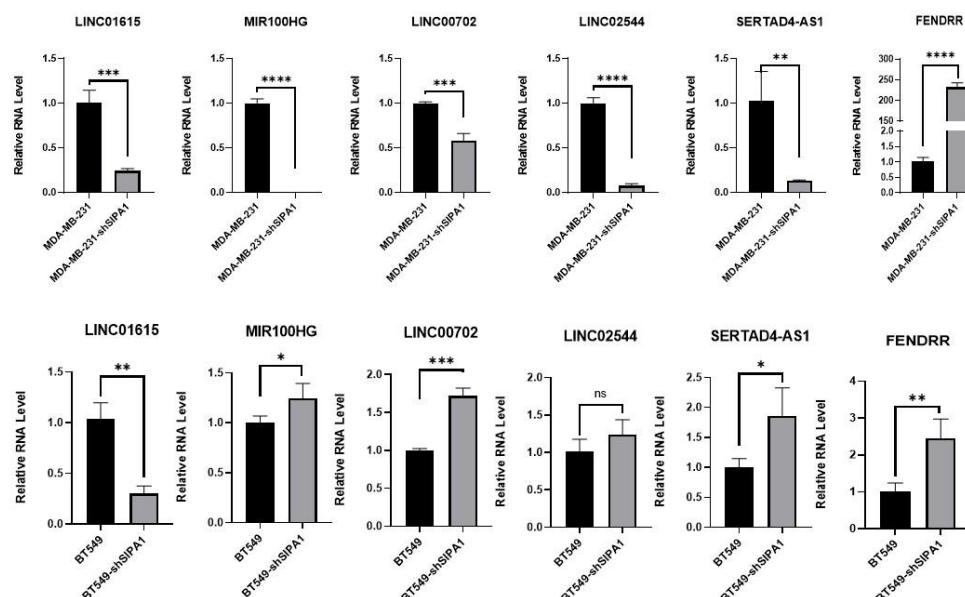

**Figure S2.** The expression of LINC01615 was decreased after knockdown of SIPA1. Real-time RT-PCR was used to detect the relative expression of MIR100HG, LINC00702, LINC01615, LINC02544, SERTAD4-AS1 and FENDRR in BT549 and BT549/sh-SIPA1 and MDA-MB-231 and MDA-MB-231/sh-SIPA1 cells. Data represent the means  $\pm$  SD. \*\*P < 0.01.

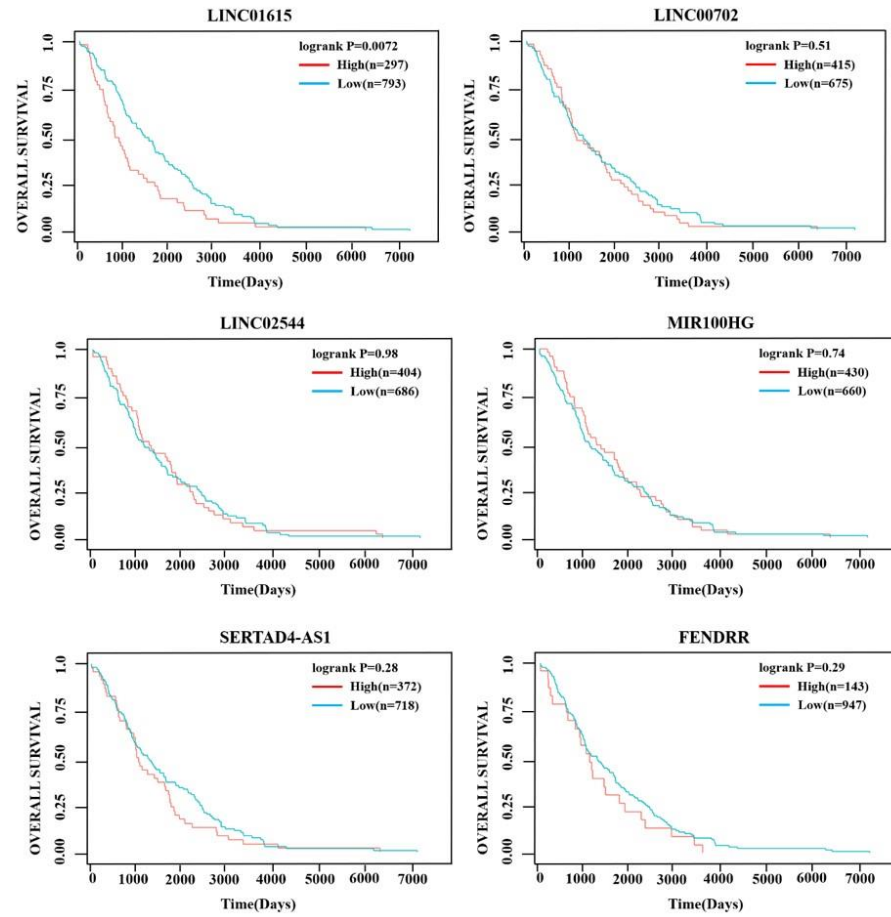

**Figure S3.** The expression level of LINC01615 was negatively correlated with the prognosis of breast cancer. Survival analysis of MIR100HG, LINC00702, LINC01615, LINC02544, SERTAD4-AS1 and FENDRR in breast cancer patients.

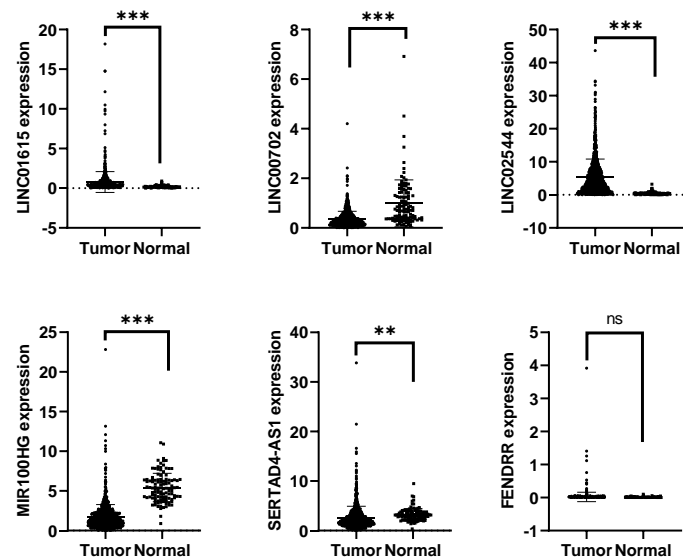

**Figure S4.** LINC01615 expression is elevated in breast cancer tissues. Differences in the expression levels of MIR100HG, LINC00702, LINC01615, LINC02544, SERTAD4-AS1 and FENDRR in breast tumor tissues and normal breast tissues.

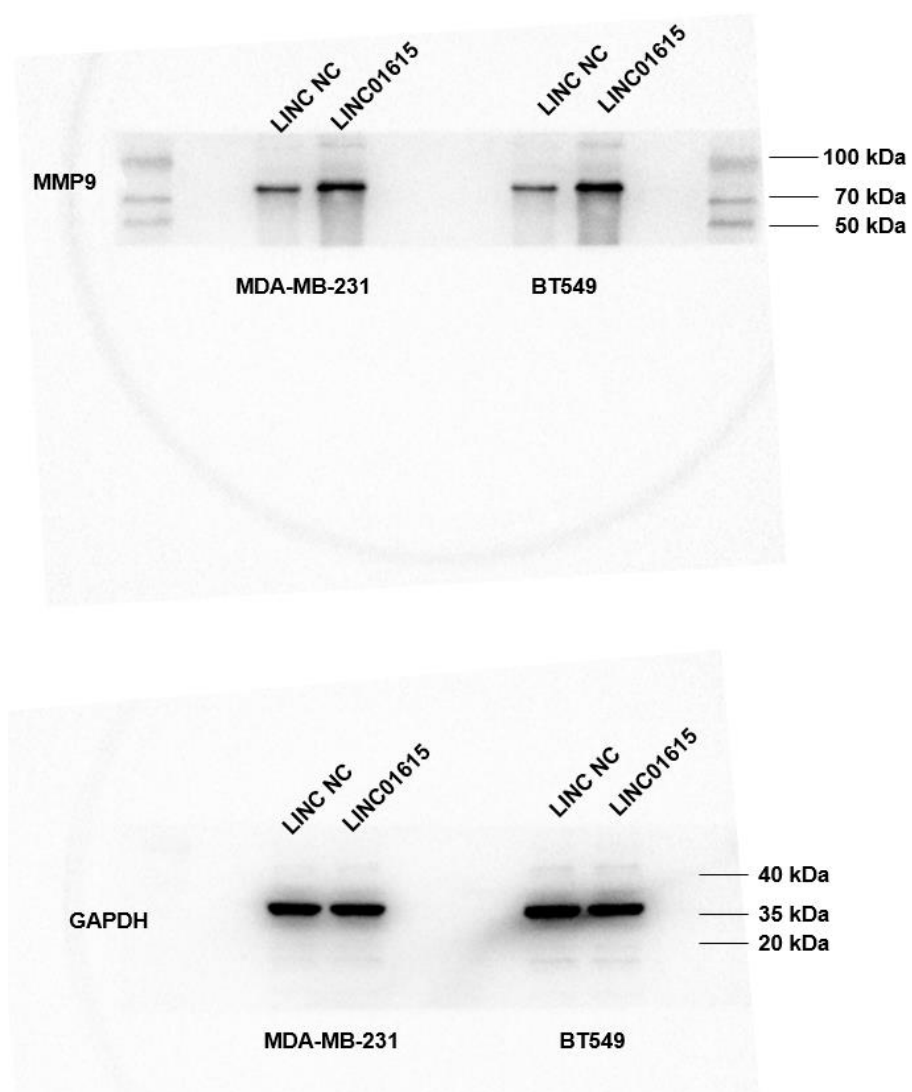

Figure S5. Original Western Blot.
